# Supplementary material
Source: PubMed Central journal article supplement (PMC5424083)
Supplement: NIHMS72110-supplement-Appendix_S1.pdf [file NIHMS72110-supplement-Appendix_S1.pdf]

## Appendix S1

Pollen productivity estimates relative to Poaceae and their respective fall speeds used in the REVEALS model. Original PPEs were taken from the following publications: Abraham et al. (2014), Abraham and Kozáková (2012), Mazier et al. (2012).

|                            | Relative pollen productivity | Fall speed of pollen [m.s <sup>-1</sup> ] |
|----------------------------|------------------------------|-------------------------------------------|
| <i>Abies</i>               | 12.77                        | 0.12                                      |
| <i>Alnus</i>               | 4.2                          | 0.021                                     |
| <i>Artemisia</i>           | 3.48                         | 0.025                                     |
| <i>Betula</i>              | 2.62                         | 0.024                                     |
| <i>Calluna vulgaris</i>    | 0.82                         | 0.038                                     |
| <i>Carpinus</i>            | 0.5                          | 0.042                                     |
| <i>Cerealia-t</i>          | 0.046                        | 0.06                                      |
| Chenopodiaceae             | 4.28                         | 0.019                                     |
| <i>Corylus</i>             | 1.4                          | 0.025                                     |
| Cyperaceae                 | 0.87                         | 0.035                                     |
| <i>Fagus</i>               | 1.2                          | 0.057                                     |
| <i>Filipendula</i>         | 2.81                         | 0.006                                     |
| <i>Fraxinus</i>            | 0.18                         | 0.022                                     |
| <i>Juniperus</i>           | 2.07                         | 0.016                                     |
| <i>Picea</i>               | 0.47                         | 0.056                                     |
| <i>Pinus</i>               | 2                            | 0.031                                     |
| <i>Plantago lanceolata</i> | 0.9                          | 0.029                                     |
| <i>Plantago media</i>      | 1.27                         | 0.024                                     |
| Poaceae                    | 1                            | 0.035                                     |
| <i>Potentilla-t</i>        | 2.47                         | 0.018                                     |
| <i>Quercus</i>             | 0.42                         | 0.035                                     |
| <i>Ranunculus acris-t</i>  | 1.96                         | 0.014                                     |
| Rubiaceae                  | 2.61                         | 0.019                                     |
| <i>Rumex acetosa-t</i>     | 2.14                         | 0.018                                     |
| <i>Salix</i>               | 2.31                         | 0.022                                     |
| <i>Secale</i>              | 3.02                         | 0.06                                      |
| <i>Tilia</i>               | 0.5                          | 0.032                                     |
| <i>Ulmus</i>               | 6                            | 0.032                                     |
| <i>Urtica</i>              | 10.52                        | 0.007                                     |

Abraham V, Kozáková R. 2012. Relative pollen productivity estimates in the modern agricultural landscape of Central Bohemia (Czech Republic). *Review of Palaeobotany and Palynology* **179**:1–12.

Abraham V, Oušková V, Kuneš P. 2014. Present-Day Vegetation Helps Quantifying Past Land Cover in Selected Regions of the Czech Republic. *PLoS ONE* **9**:e100117.

Mazier F, Gaillard MJ, Kuneš P, Sugita S, Trondman AK, Broström A. 2012. Testing the effect of site selection and parameter setting on REVEALS-model estimates of plant abundance using the Czech Quaternary Palynological Database. *Review of Palaeobotany and Palynology* **187**:38–49.
