# Supplementary material
Source: PubMed Central journal article supplement (PMC5424083)
Supplement: NIHMS72110-supplement-Appendix_S2.pdf [file NIHMS72110-supplement-Appendix_S2.pdf]

## Appendix S2

### Pollen profiles

Hradec nad Svitavou

49° 43' 0.1'' N, 16°28'21.1'' E, 427 m a.s.l.

Pollen analyst Helena Svitavská Svobodová

Jedlová

49°39'53.6'' N, 16°18'6.6'' E, 602 m a.s.l.

Pollen analyst Helena Svitavská Svobodová

Kameničky

49°44'19.2'' N, 15°57'49.1'' E. 629 m a.s.l.

Pollen analyst Eliška Rybničková

Lubenský les

49°45'50.5'' N, 16°09'58.5'' E, 634 m a.s.l.

Pollen analyst Markéta G. Švarcová

Šestidomí

49°39'44.8'' N, 16°19'25.9'' E, 599 m a.s.l.

Pollen analyst Markéta G. Švarcová

Řásná

49°13'38.3'' N, 15 °22'28,3'' E, 679 m a.s.l.

Pollen analyst Petr Kuneš

### Dated layers

| <i>Site name</i>    | <i>Depth [cm]</i> | <i><sup>14</sup>C age</i> | <i>Laboratory number</i> | <i>Material dated</i> |
|---------------------|-------------------|---------------------------|--------------------------|-----------------------|
| Hradec nad Svitavou | 5                 | 140±20                    | UG-20511                 | bulk peat sample      |
| Hradec nad Svitavou | 28                | 2380±20                   | UG-20512                 | bulk peat sample      |
| Hradec nad Svitavou | 58                | 3620±20                   | UG-20513                 | bulk peat sample      |
| Hradec nad Svitavou | 86                | 11130±30                  | UG-20514                 | bulk peat sample      |
| Jedlová             | 9                 | 1660±25                   | UG-18367                 | bulk peat sample      |
| Jedlová             | 23                | 6370±30                   | UG-18368                 | bulk peat sample      |
| Jedlová             | 40                | 8030±30                   | UG-15645                 | bulk peat sample      |
| Jedlová             | 55                | 8620±30                   | UG-15646                 | bulk peat sample      |
| Jedlová             | 75                | 9000±30                   | UG-15647                 | bulk peat sample      |
| Jedlová             | 100               | 9160±30                   | UG-15648                 | wood                  |

|              |        |           |           |                                                                       |
|--------------|--------|-----------|-----------|-----------------------------------------------------------------------|
| Jedlová      | 105    | 11270±30  | UG-15649  | bulk peat sample                                                      |
| Jedlová      | 130    | 11930±30  | UG-15650  | bulk peat sample                                                      |
| Kameničky    | 15.25  | 1830±150  | Hv-12961  | bulk peat sample                                                      |
| Kameničky    | 20.5   | 2140±80   | Hv-11529  | bulk peat sample                                                      |
| Kameničky    | 30.5   | 4160±105  | Hv-11530  | bulk peat sample                                                      |
| Kameničky    | 45.5   | 6100±105  | Hv-11531  | bulk peat sample                                                      |
| Kameničky    | 60.5   | 8080±190  | Hv-11532  | bulk peat sample                                                      |
| Kameničky    | 65.25  | 8145±295  | Hv-12962  | bulk peat sample                                                      |
| Kameničky    | 70.5   | 7580±315  | Hv-11533  | bulk peat sample                                                      |
| Kameničky    | 95     | 9985±220  | Hv-11534  | bulk peat sample                                                      |
| Kameničky    | 122.5  | 11070±245 | Hv-11536  | bulk peat sample                                                      |
| Lubenský les | 29     | 3360±25   | UG-15651  | bulk peat sample                                                      |
| Lubenský les | 64     | 5230±40   | Poz-55298 | twigs of pine                                                         |
| Lubenský les | 67     | 6440±25   | UG-15652  | bulk peat sample                                                      |
| Lubenský les | 77     | 9170±30   | UG-15653  | bulk peat sample                                                      |
| Lubenský les | 82     | 5390±40   | Poz-55299 | twigs of pine                                                         |
| Lubenský les | 103    | 10060±30  | UG-15654  | bulk peat sample                                                      |
| Lubenský les | 114    | 4280±50   | Poz-55300 | plant remains                                                         |
| Lubenský les | 130    | 11100±60  | Poz-51945 | terrestrial plant seeds                                               |
| Šestidomí    | 56     | 9070±30   | UG-15658  | bulk peat sample                                                      |
| Šestidomí    | 102    | 9840±30   | UG-15659  | bulk peat sample                                                      |
| Šestidomí    | 126    | 9910±30   | UG-15660  | bulk peat sample                                                      |
| Šestidomí    | 164    | 10850±30  | UG-15661  | bulk peat sample                                                      |
| Šestidomí    | 217    | 12490±60  | Poz-51946 | terrestrial plant seeds                                               |
| Řásná        | 40.5   | 160±20    | UG-19581  | plant seeds ( <i>Betula</i> , <i>Urtica</i> , <i>Carex</i> ) + branch |
| Řásná        | 80.5   | 890±25    | UG-19580  | spruce needle, <i>Rubus</i> fragment                                  |
| Řásná        | 102.5  | 5830±30   | UG-22641  | fragment of wood                                                      |
| Řásná        | 135    | 6310±30   | UG-20897  | wood                                                                  |
| Řásná        | 162.25 | 6960±30   | UG-20898  | wood                                                                  |
| Řásná        | 179.5  | 7690±30   | UG-19579  | <i>Comarum</i> seeds                                                  |
| Řásná        | 229    | 6880±40   | UG-19578  | branches (wood)                                                       |
| Řásná        | 350    | 8930±30   | UG-19577  | <i>Pinus</i> seed, <i>Betula</i> scale                                |
| Řásná        | 390.5  | 9290±30   | UG-19576  | plant remains ( <i>Phragmites</i> , <i>Cyperus fuscus</i> )           |
| Řásná        | 419.5  | 13180±35  | UG-22642  | bulk peat sample                                                      |

## Age-depth models constructed for each pollen profile

### Hradec nad Svitavou

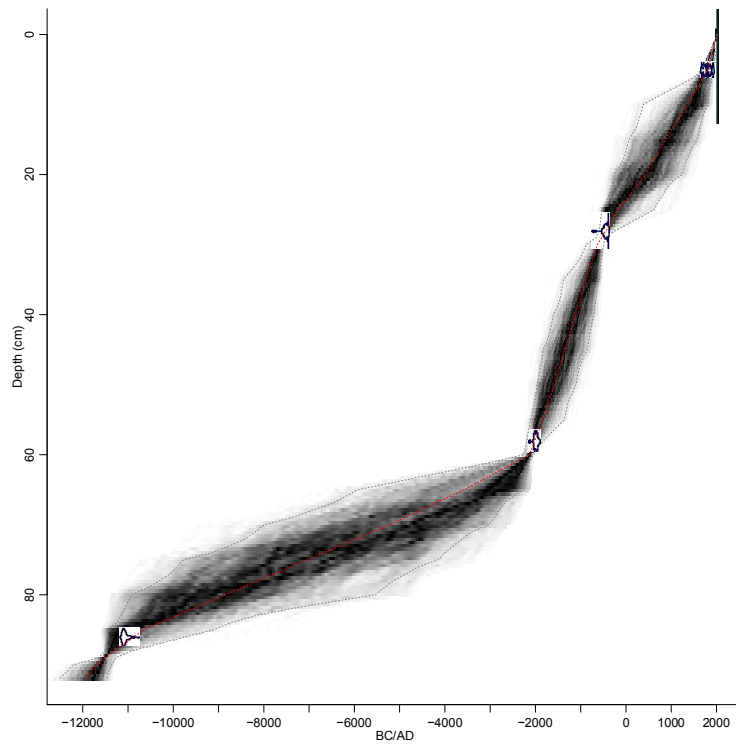

### Jedlová

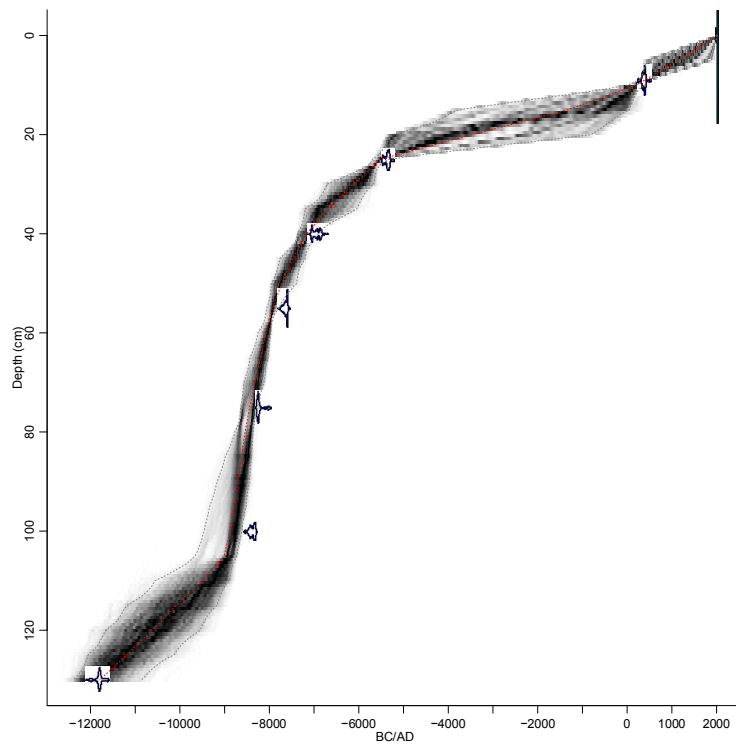

## Kameničky

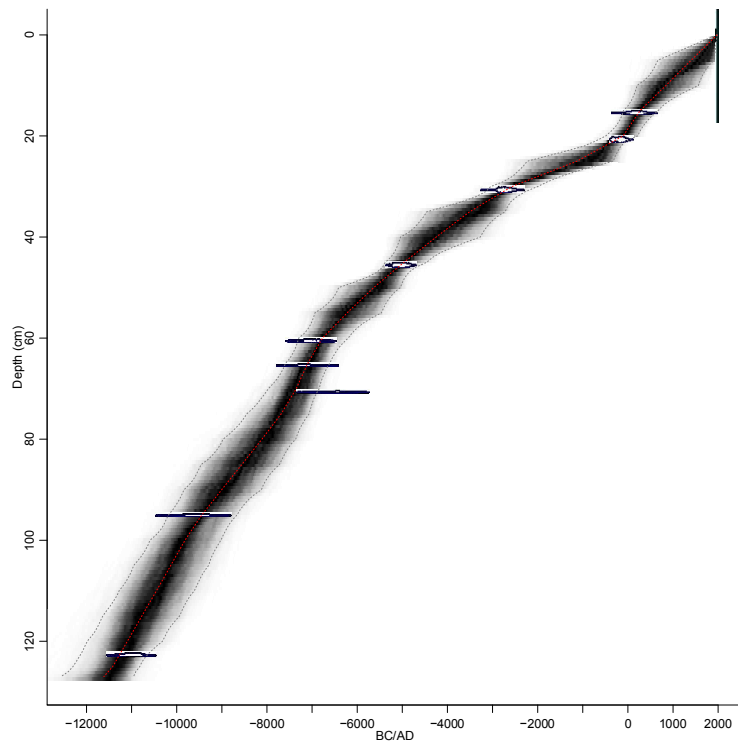

## Lubenský les

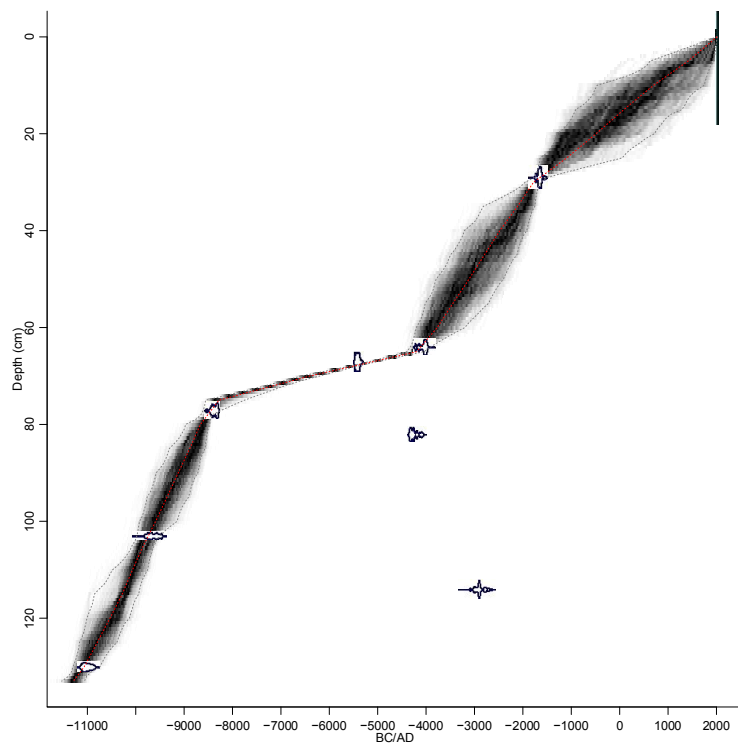

## Řásná

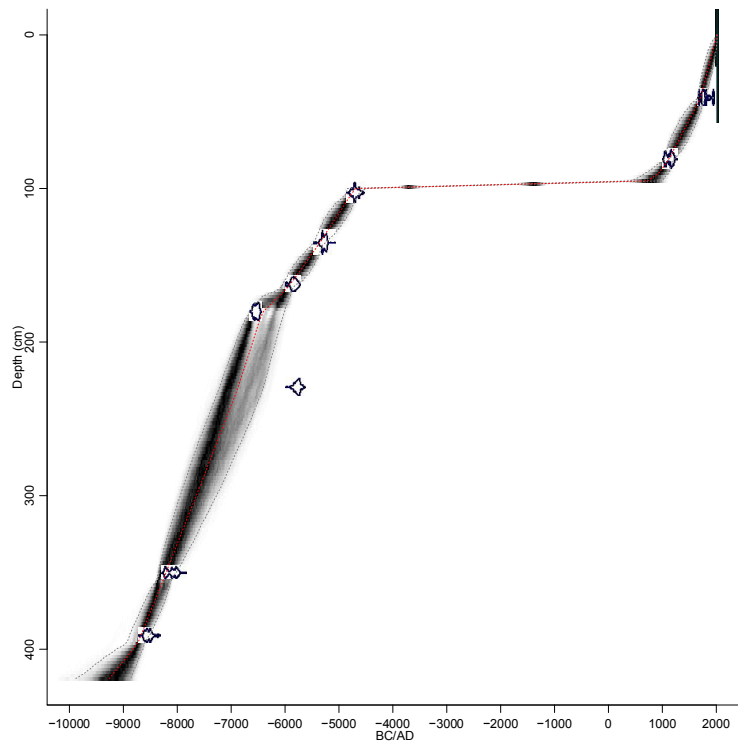

## Šestidomí

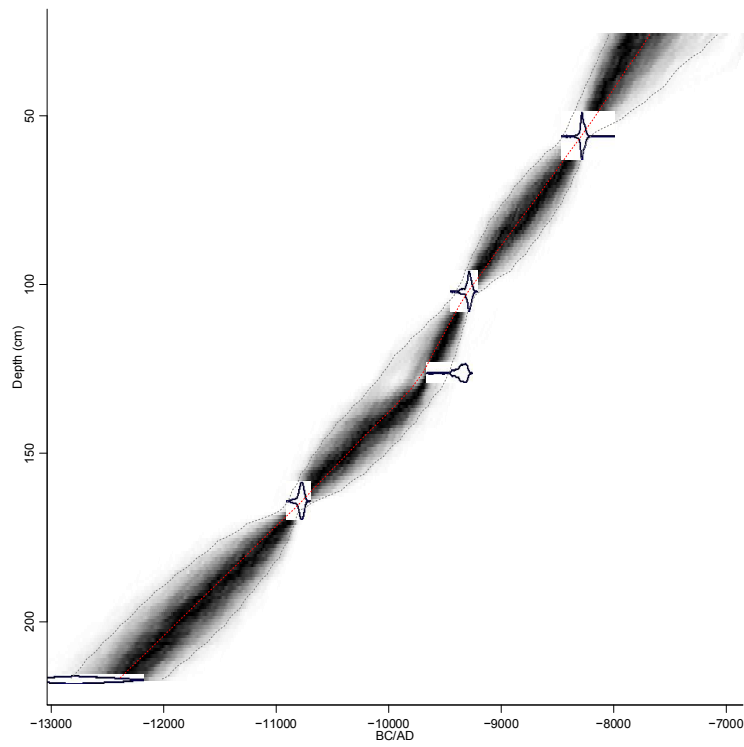

# HRADEC NAD SVITAVOU

Pollen percentages

Tilia 1.5.12 Grimm E.C. (1991-2011)

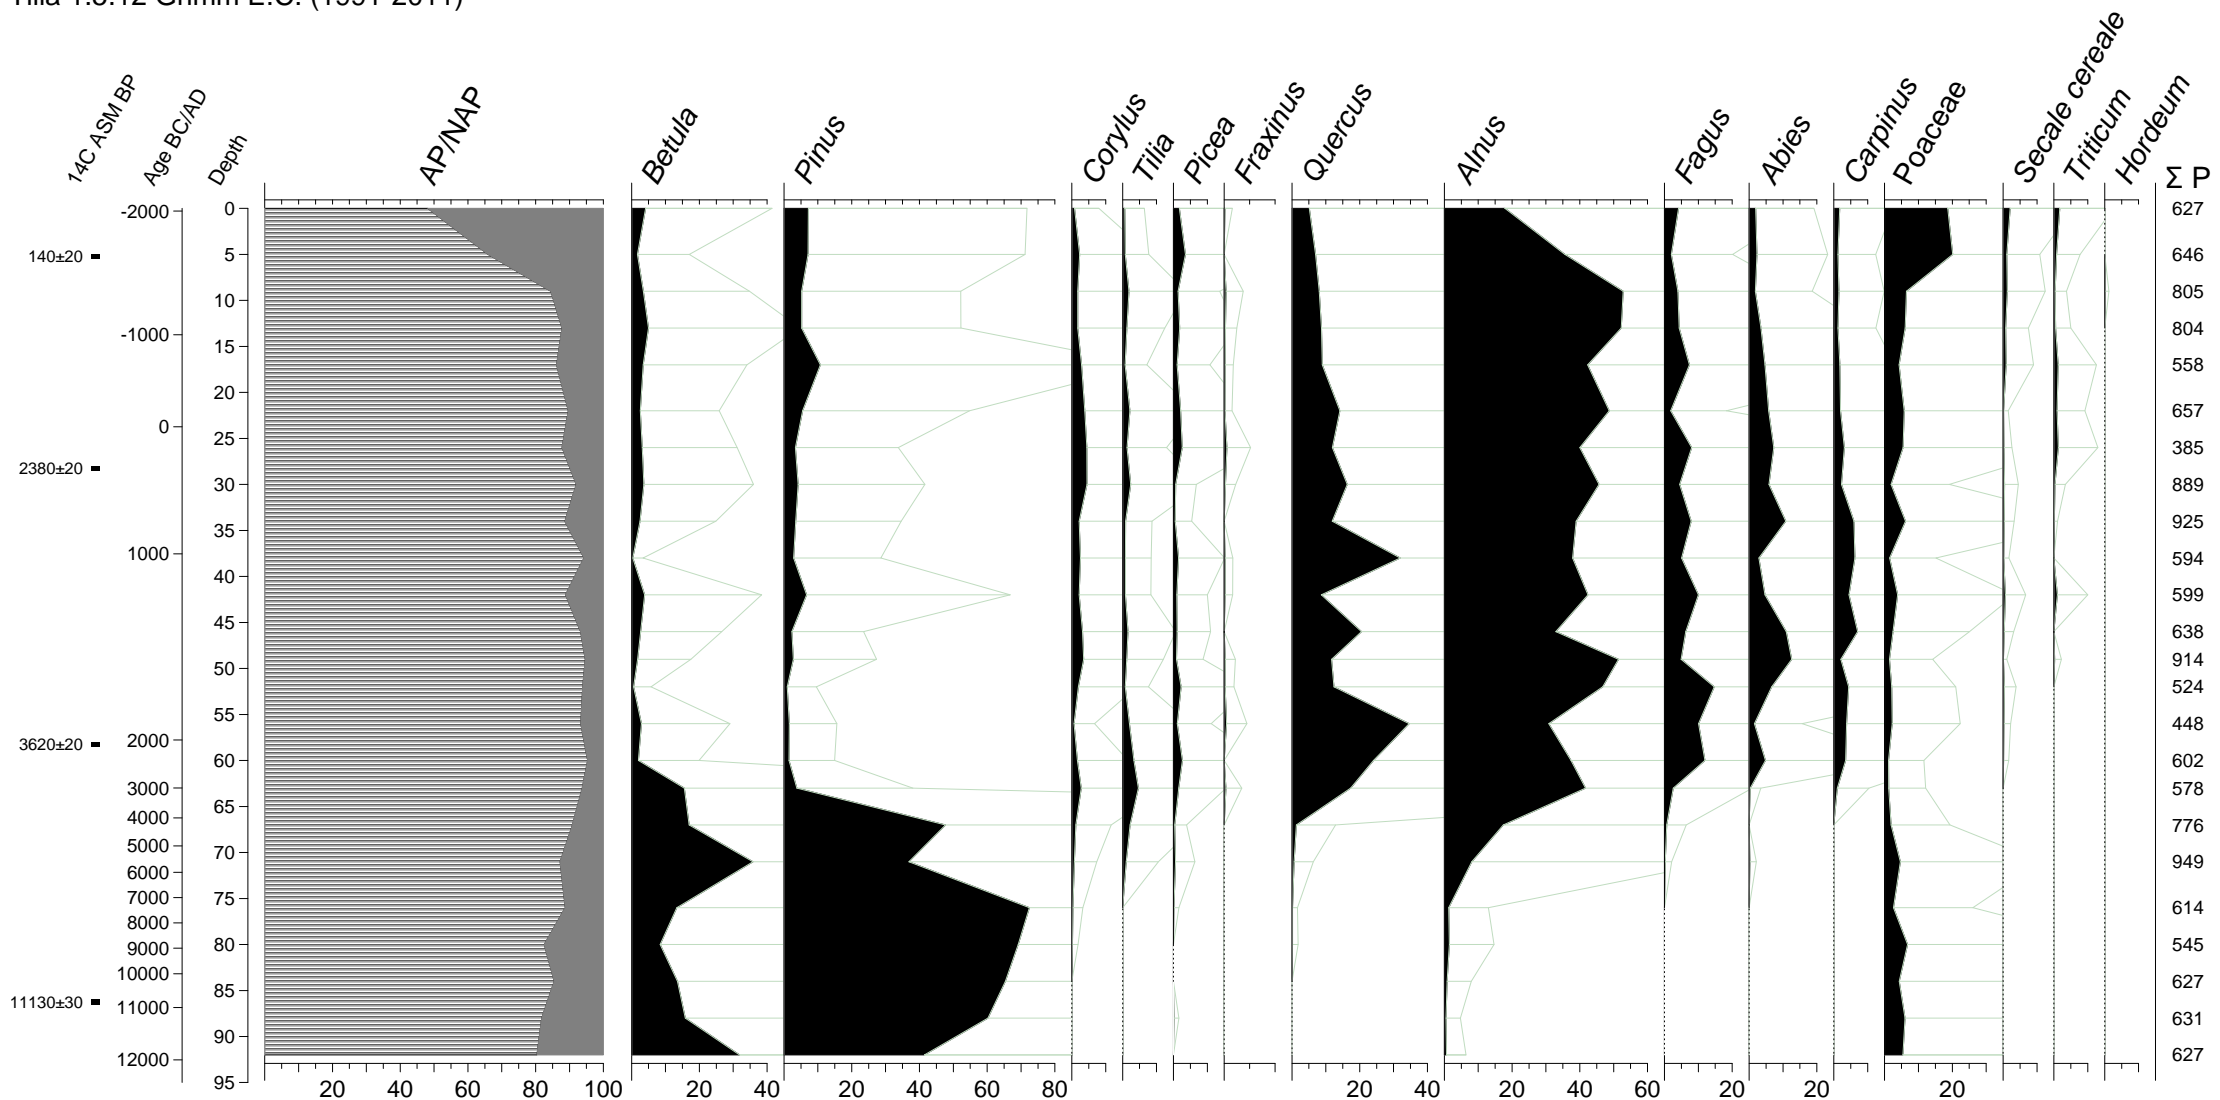







# LUBENSKÝ LES

Pollen percentages

Tilia 1.5.12 Grimm E.C. (1991-2011)

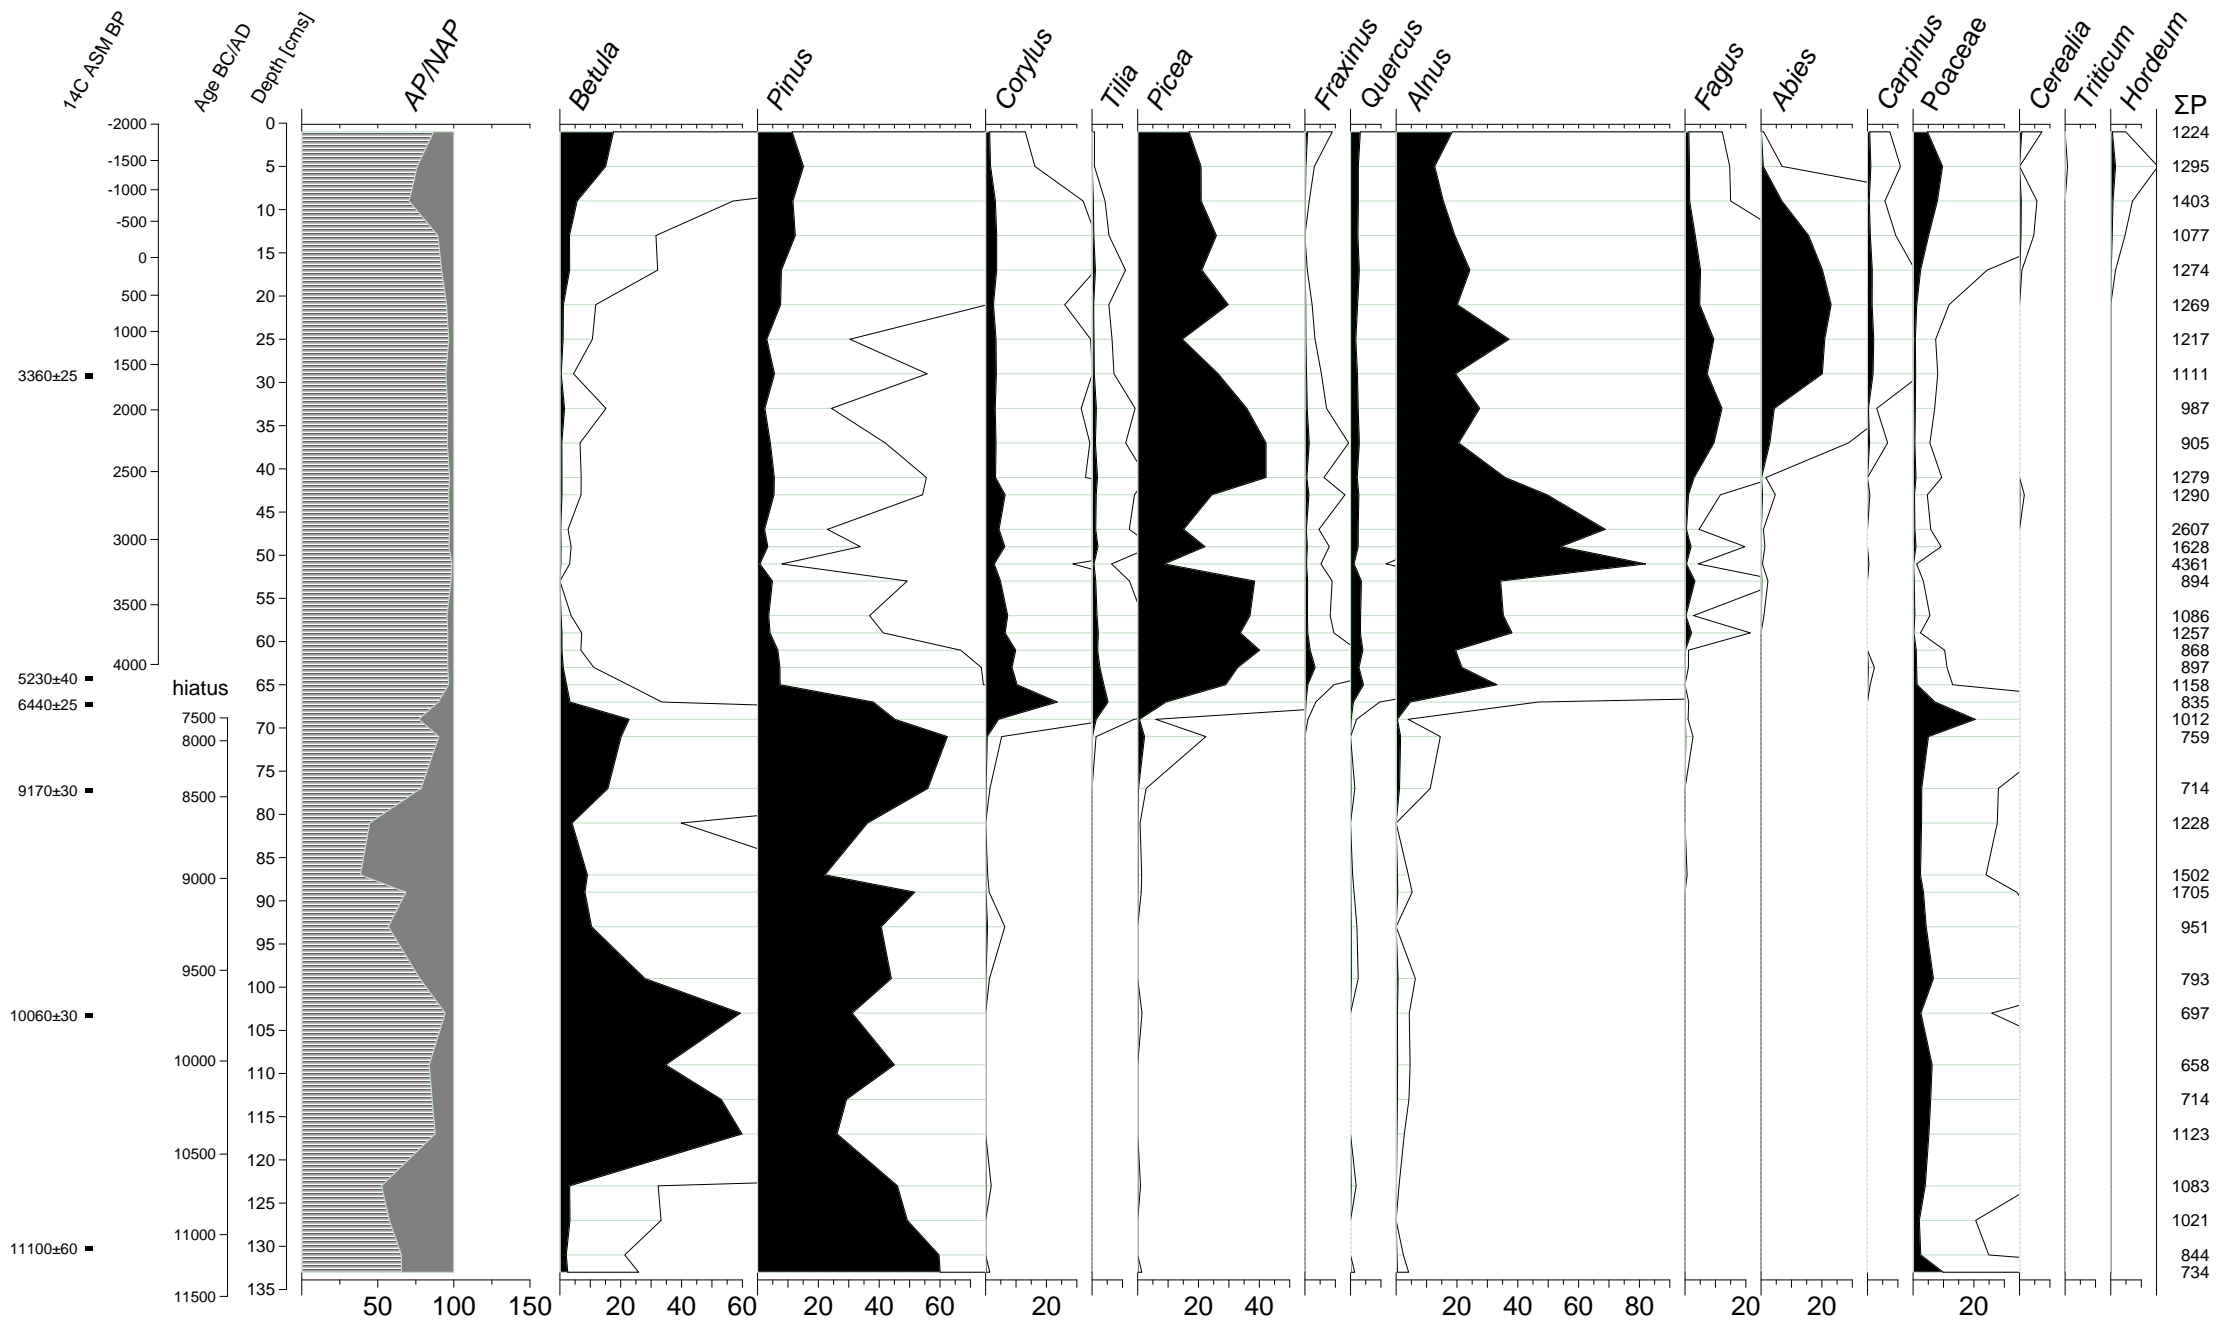

ŘÁSNÁ  
 Pollen percentages  
 Tilia 1.5.12 Grimm E.C. (1991-2011)

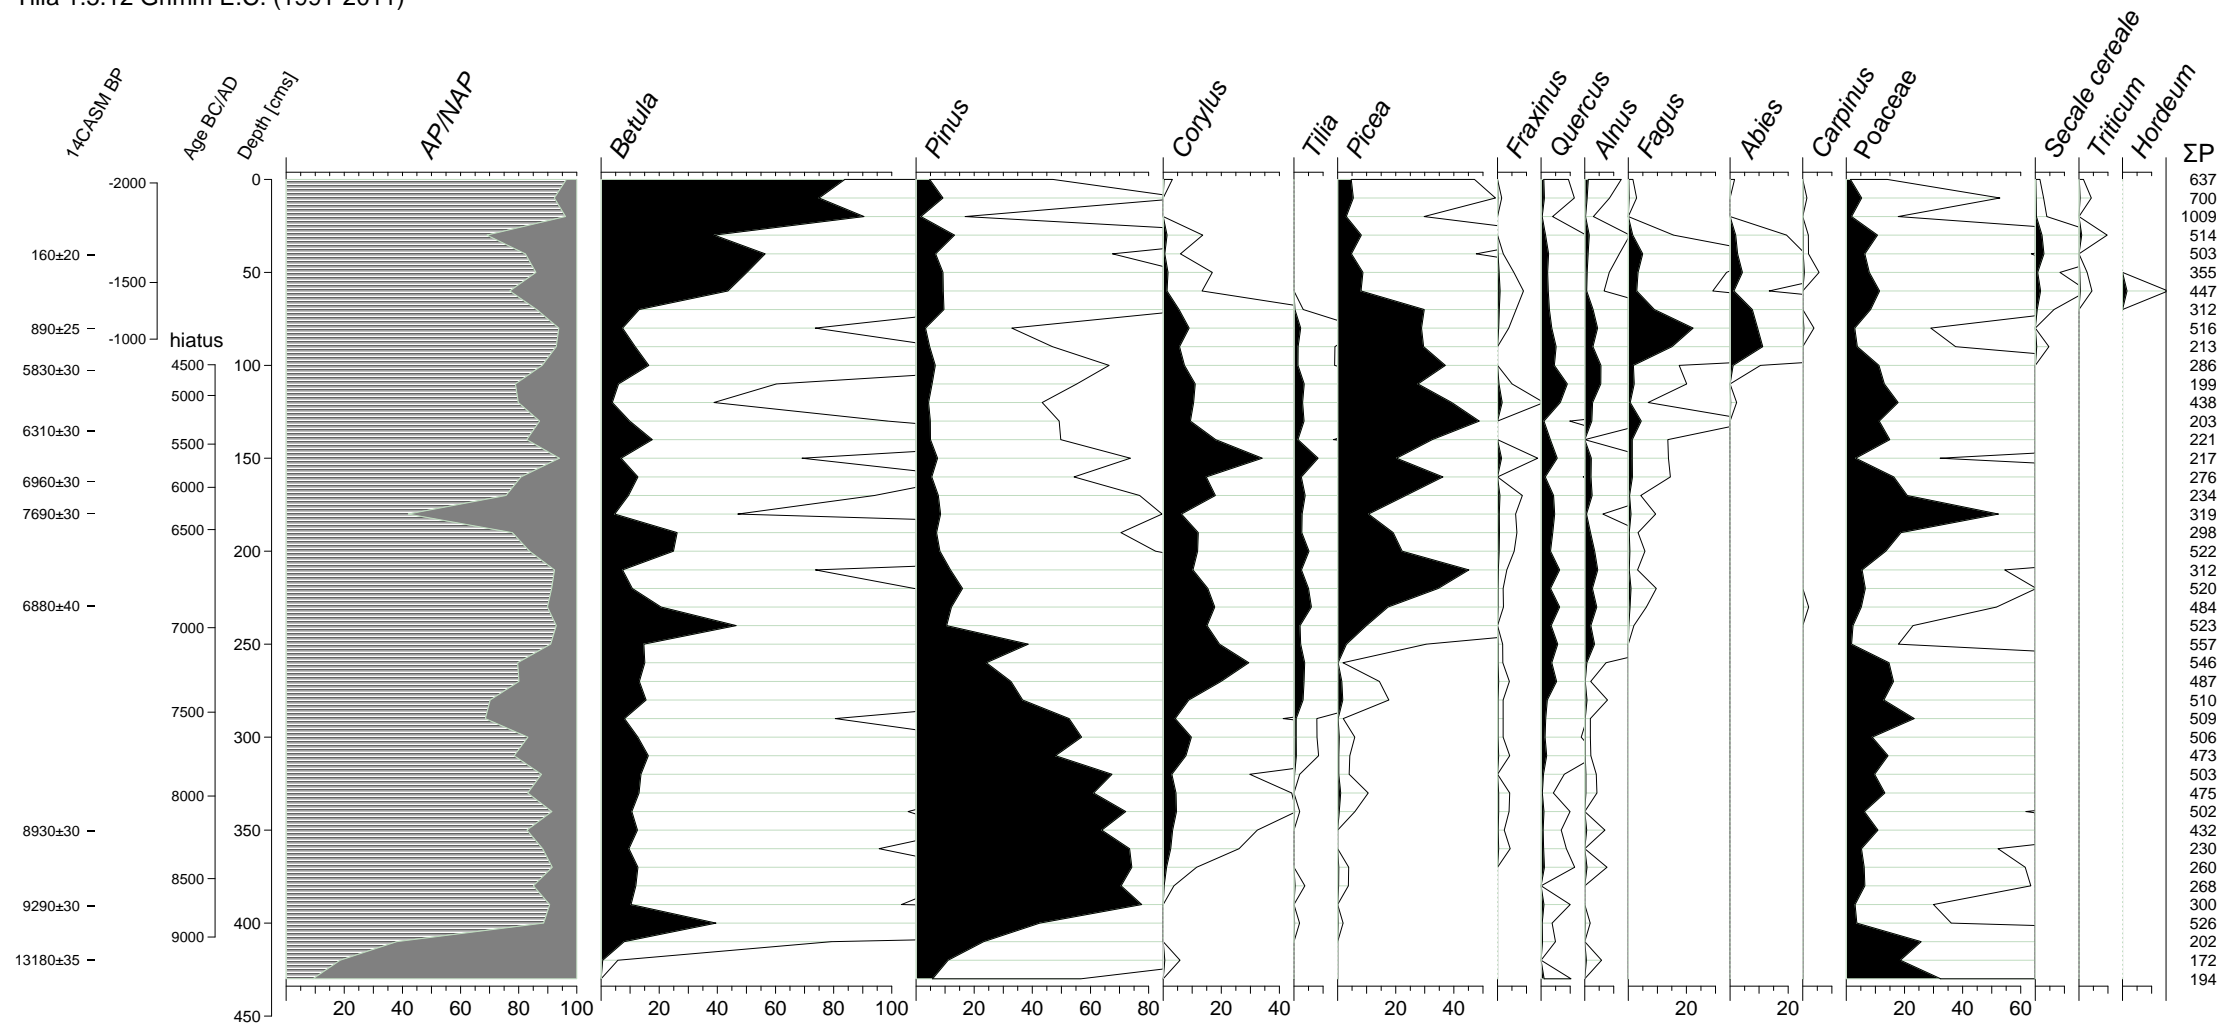

# ŠESTIDOMÍ

Pollen percentages  
Tilia 1.5.12 Grimm E.C. (1991-2011)

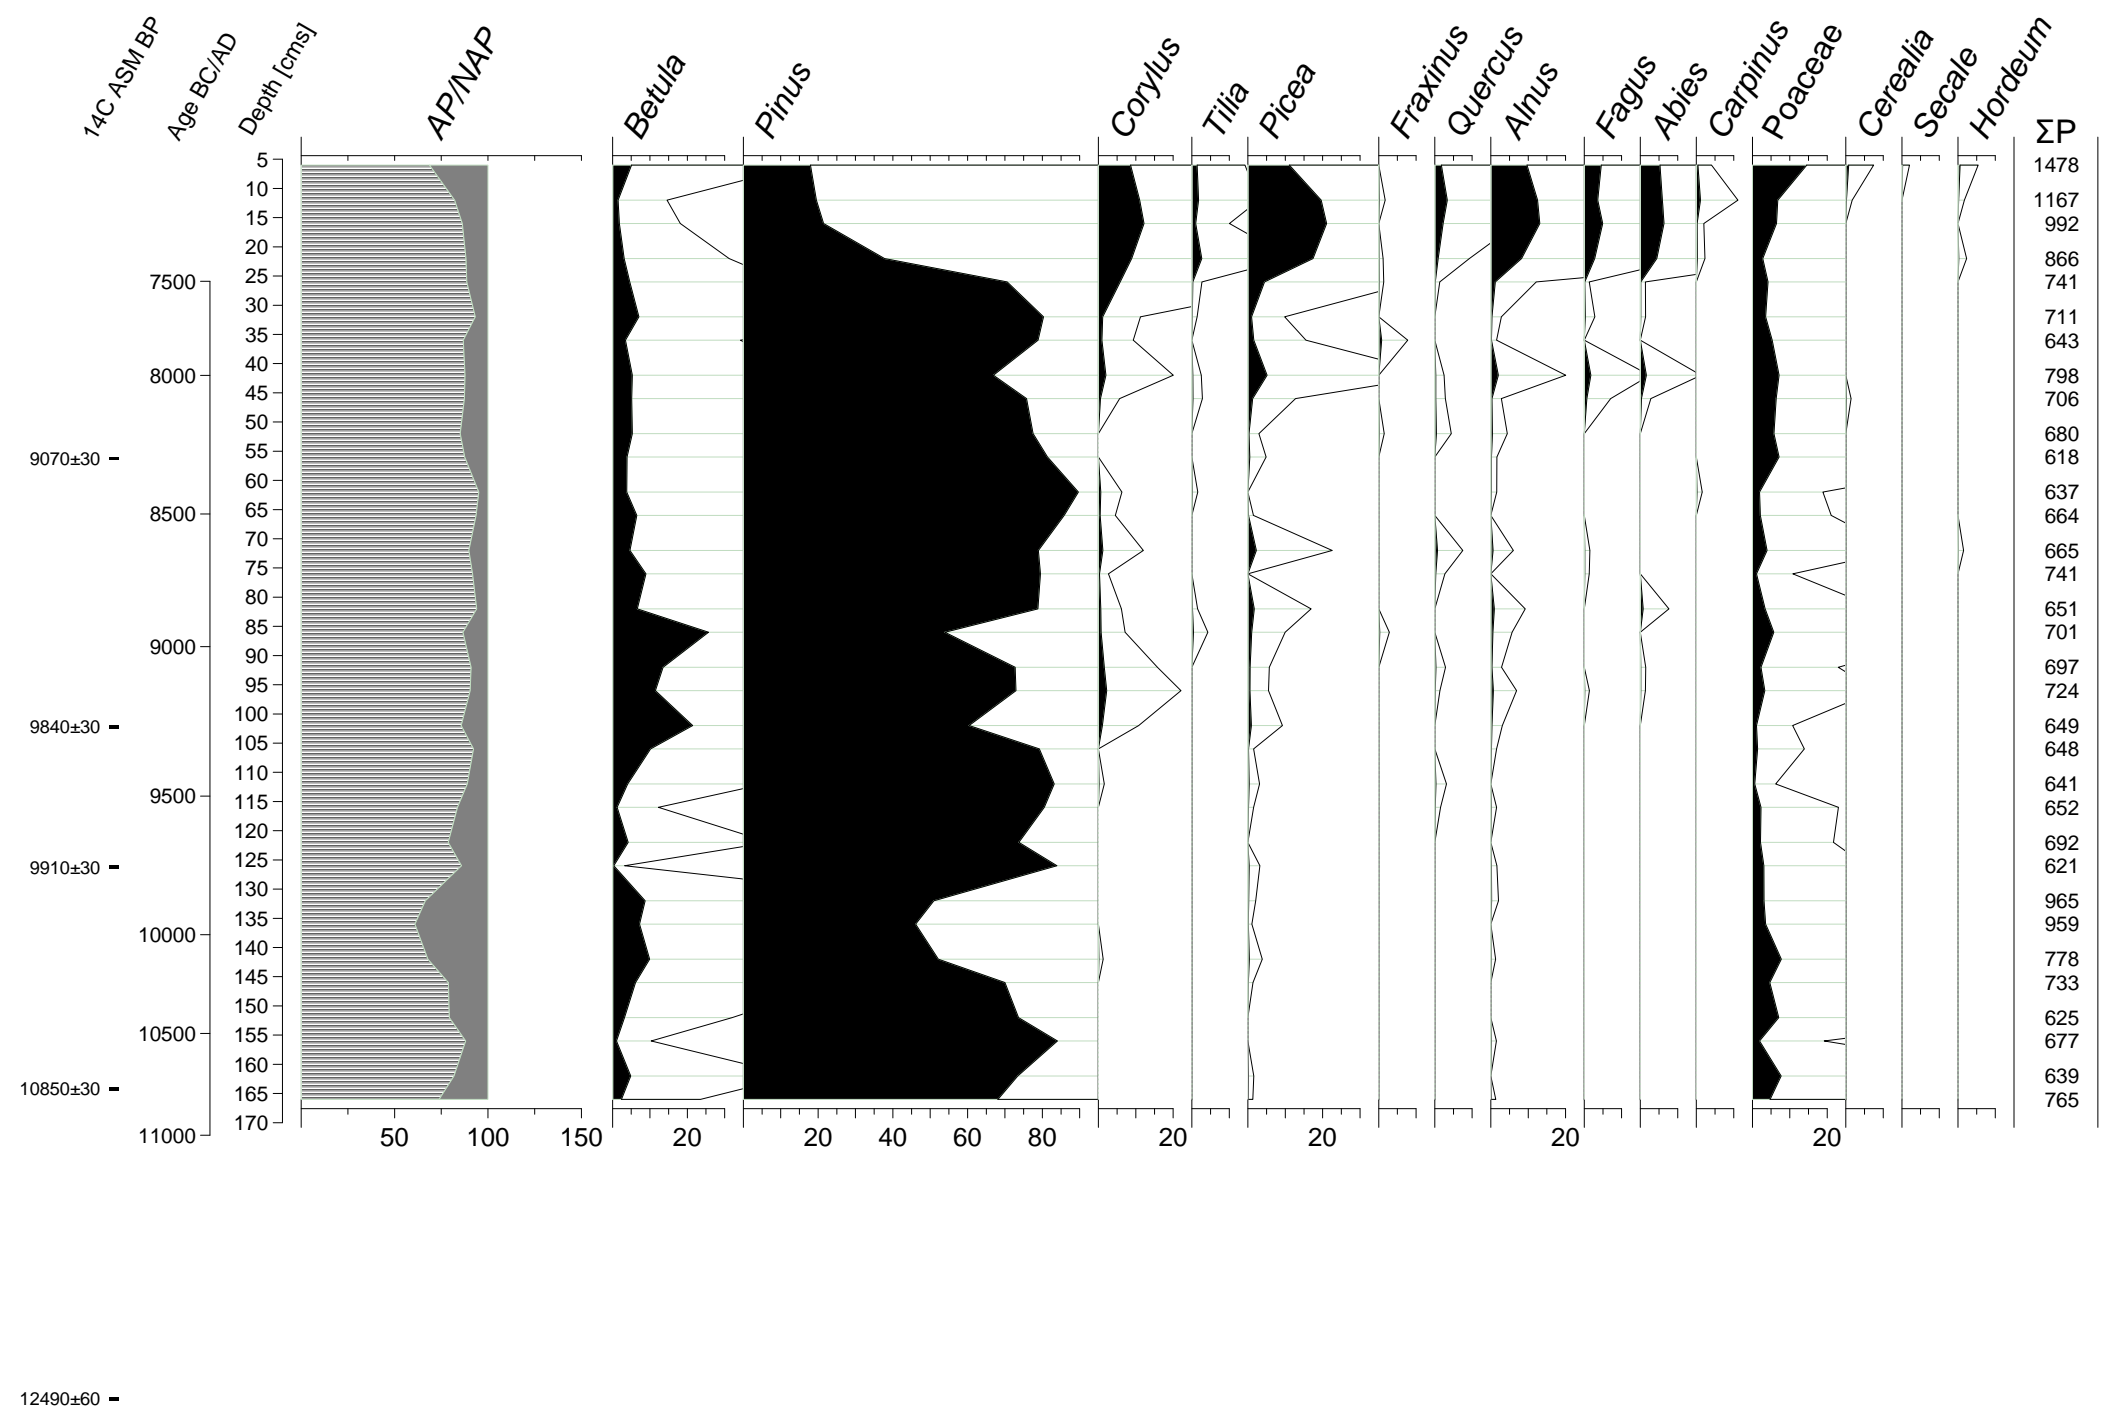

12490±60 -
