# Supplementary material
Source: PubMed Central journal article supplement (PMC5424083)

## Appendix S3

The distribution (presence in individual parishes) of tree species as well as softwood and hardwood in the 1780s based on the Josephian cadastre.

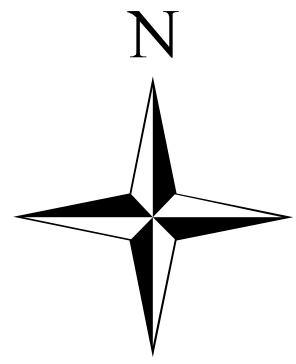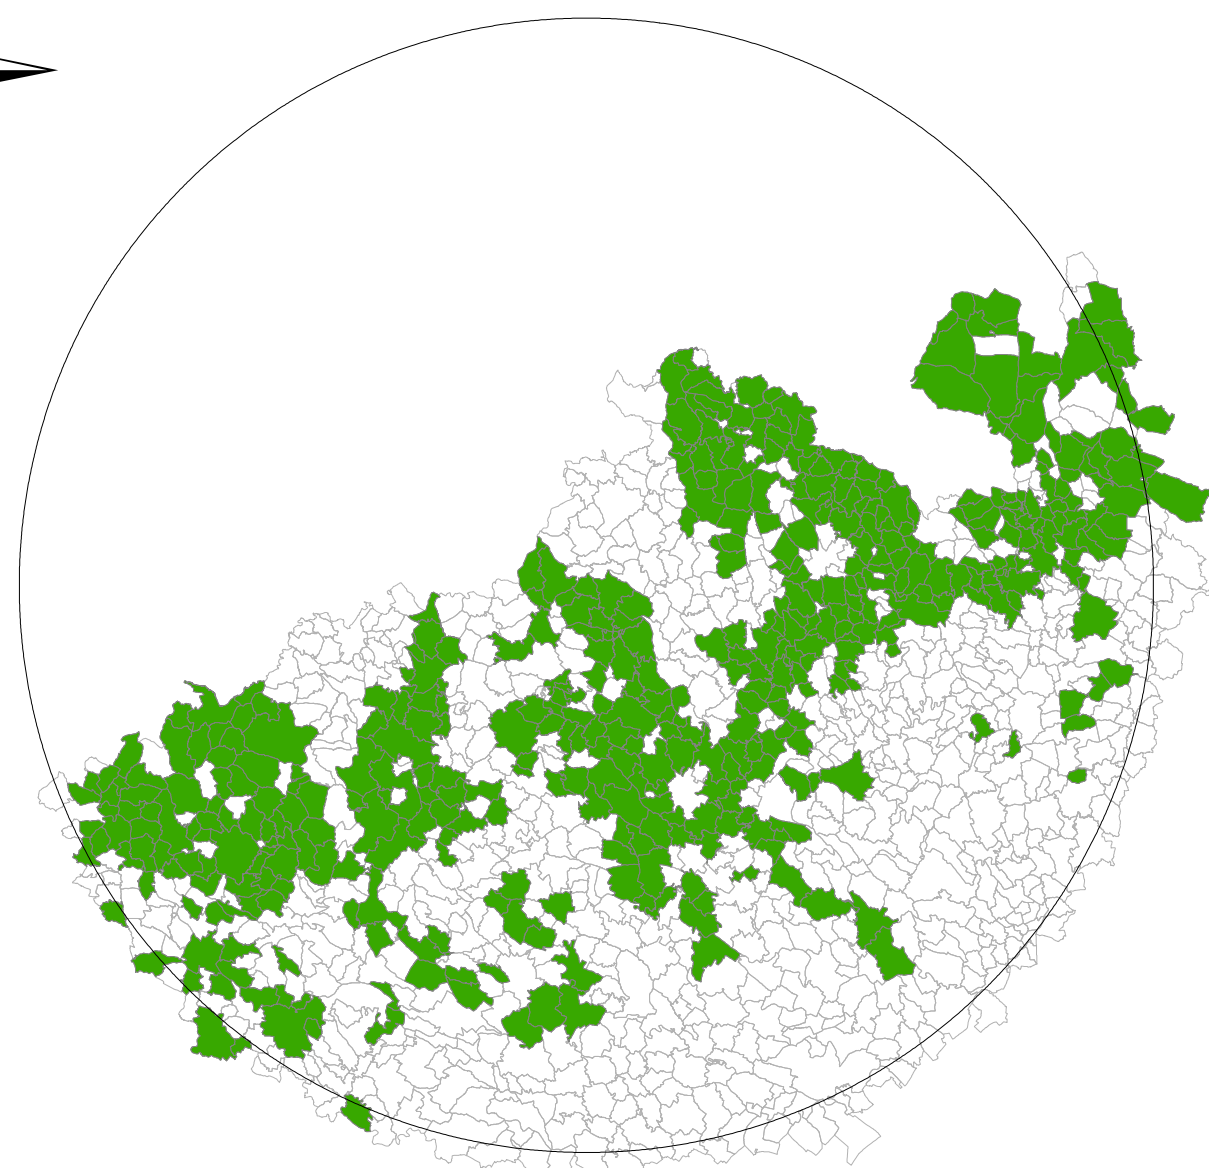

**Picea**

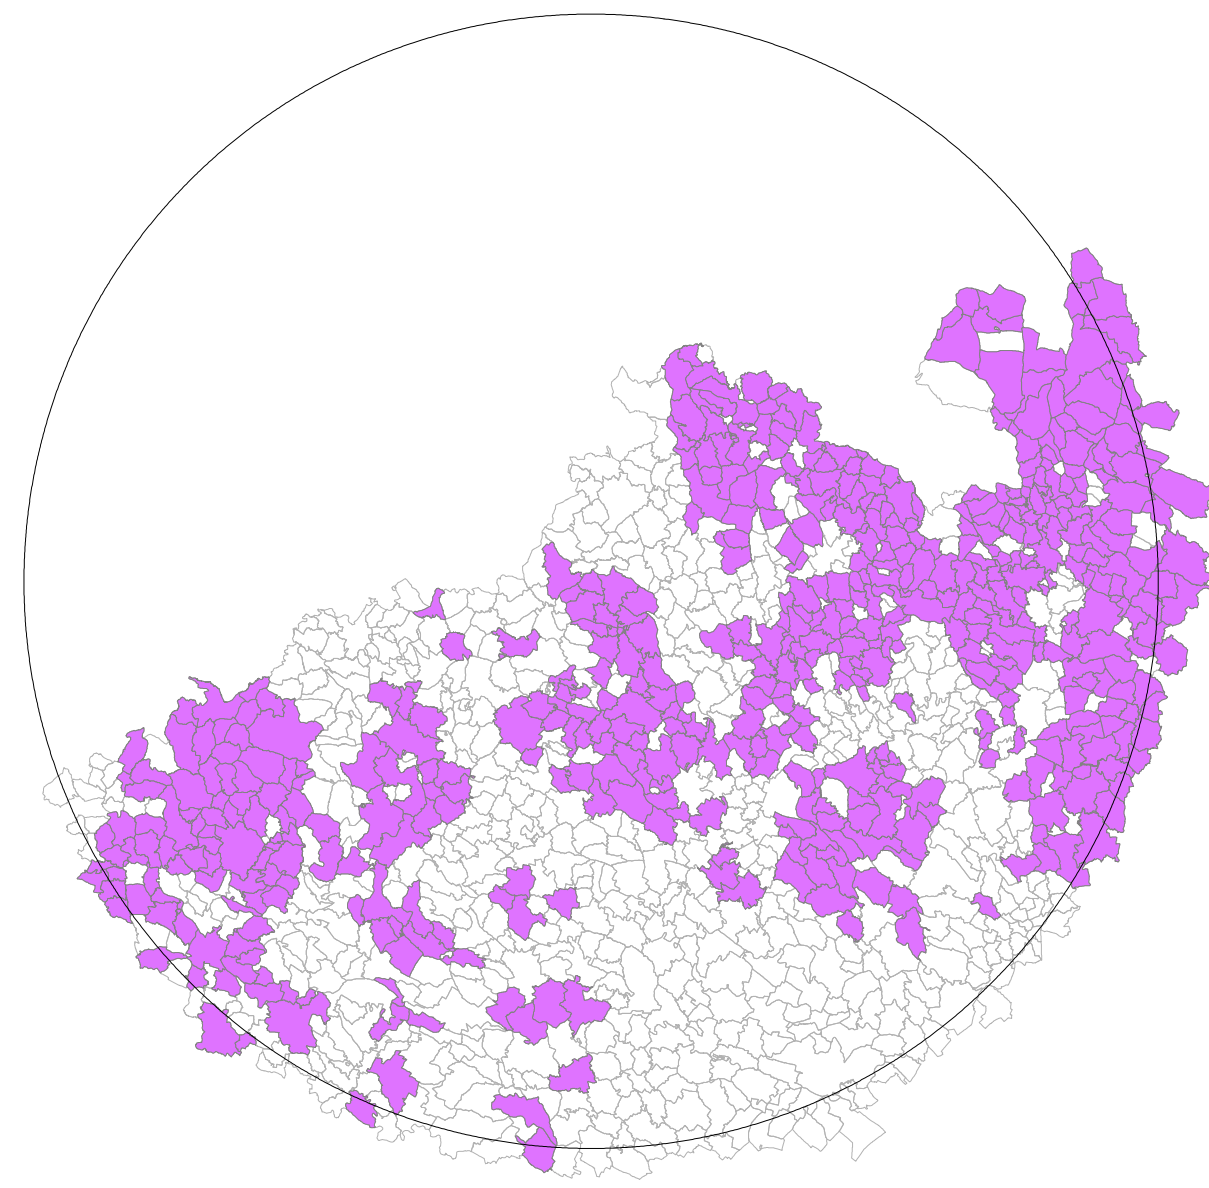

**Abies**

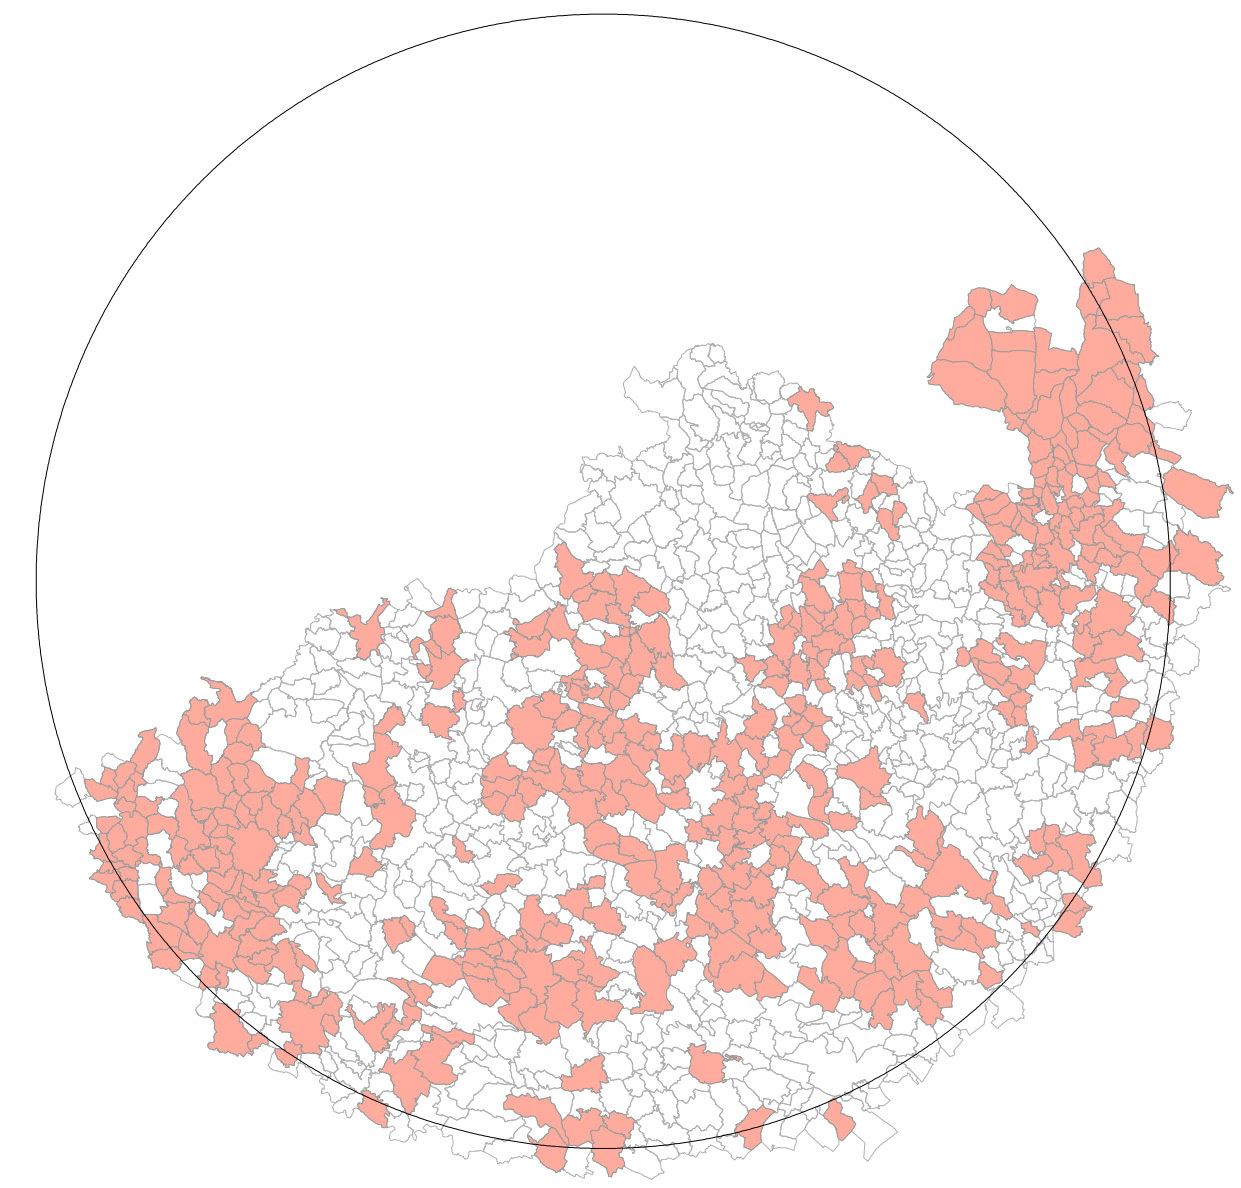

**Pinus**

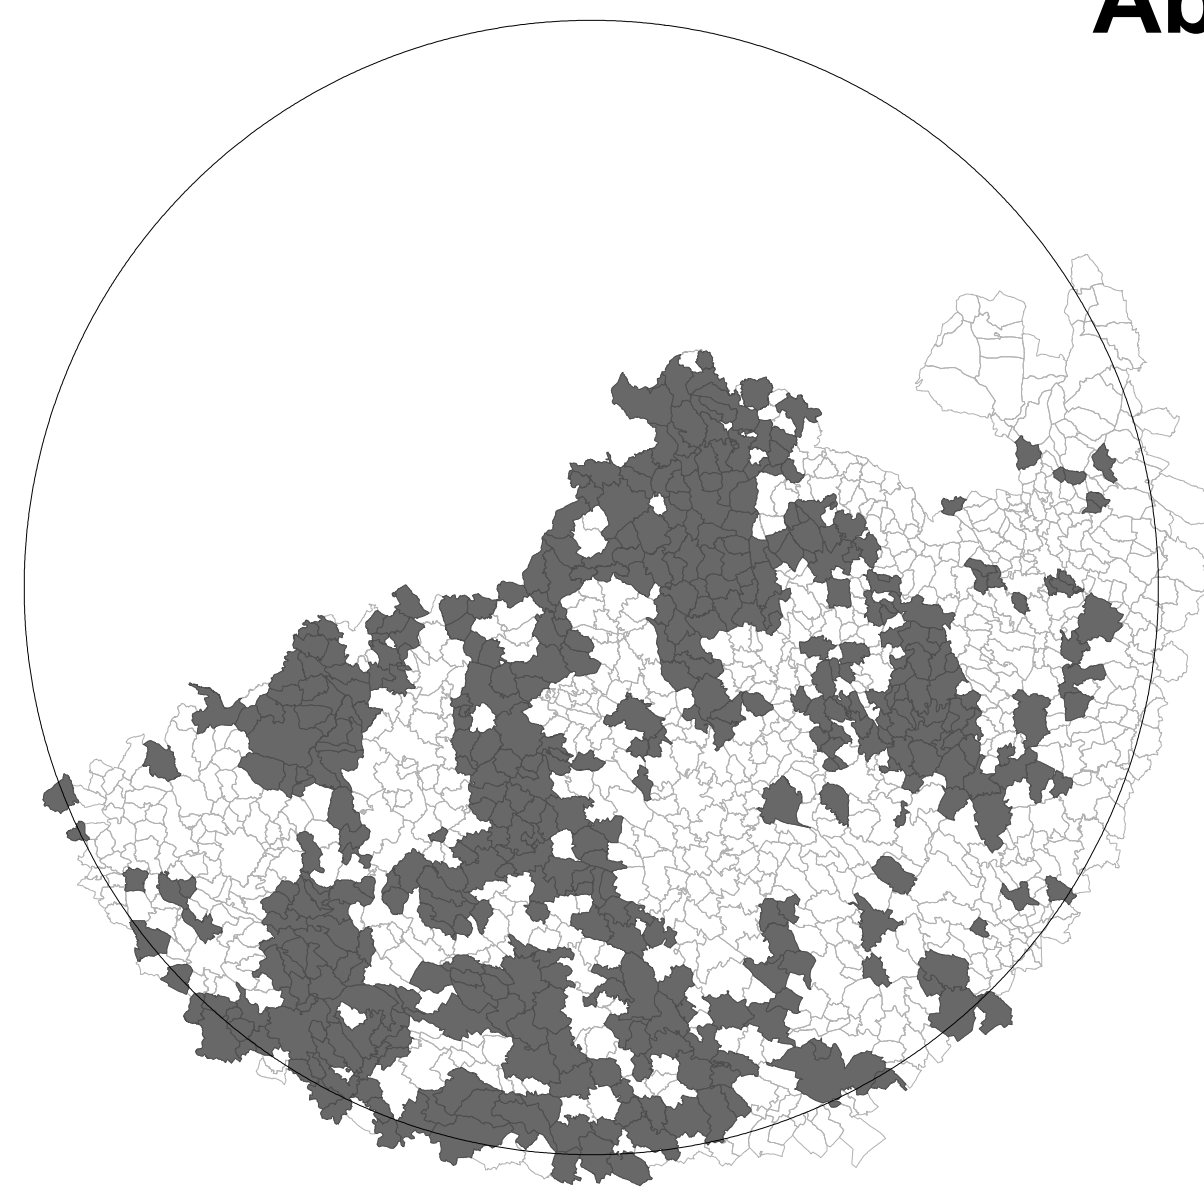

**Softwood**

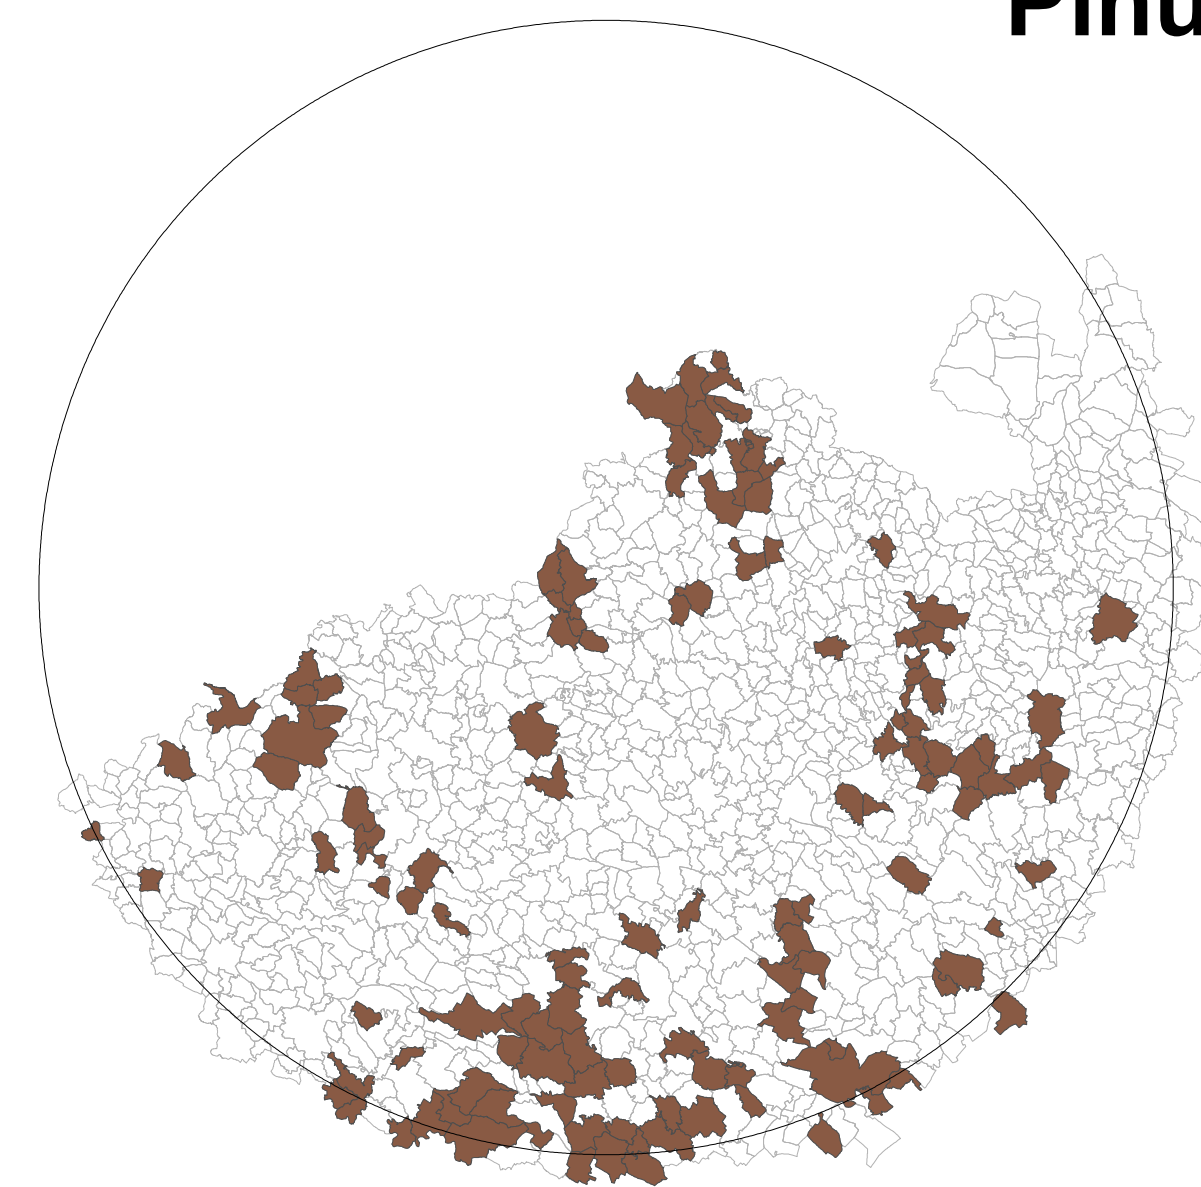

**Hardwood**

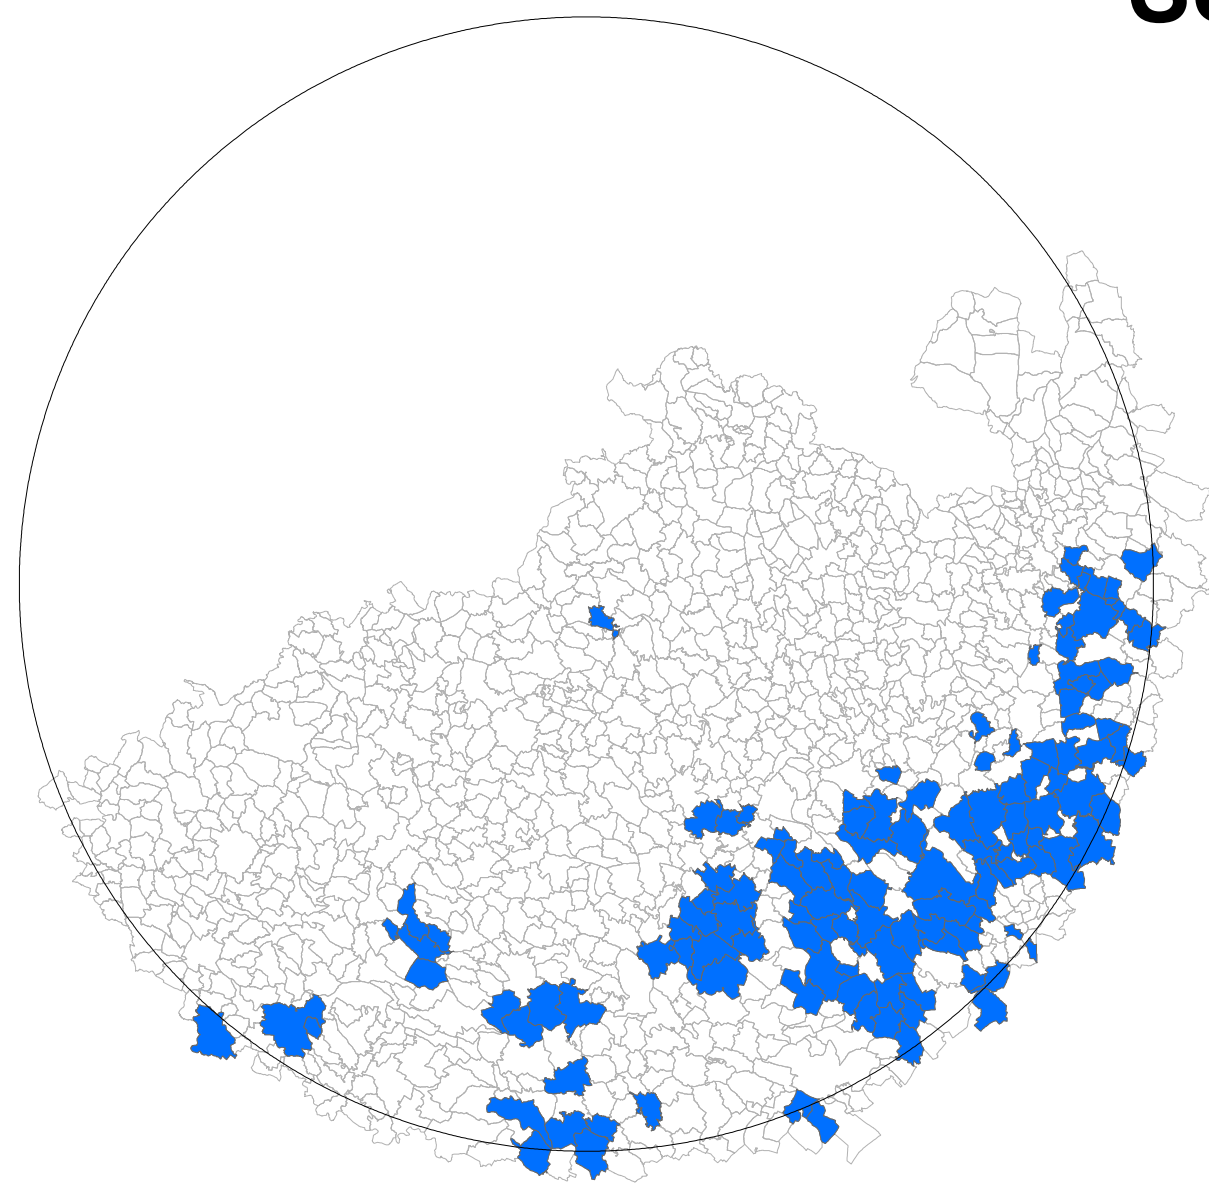

**Quercus**

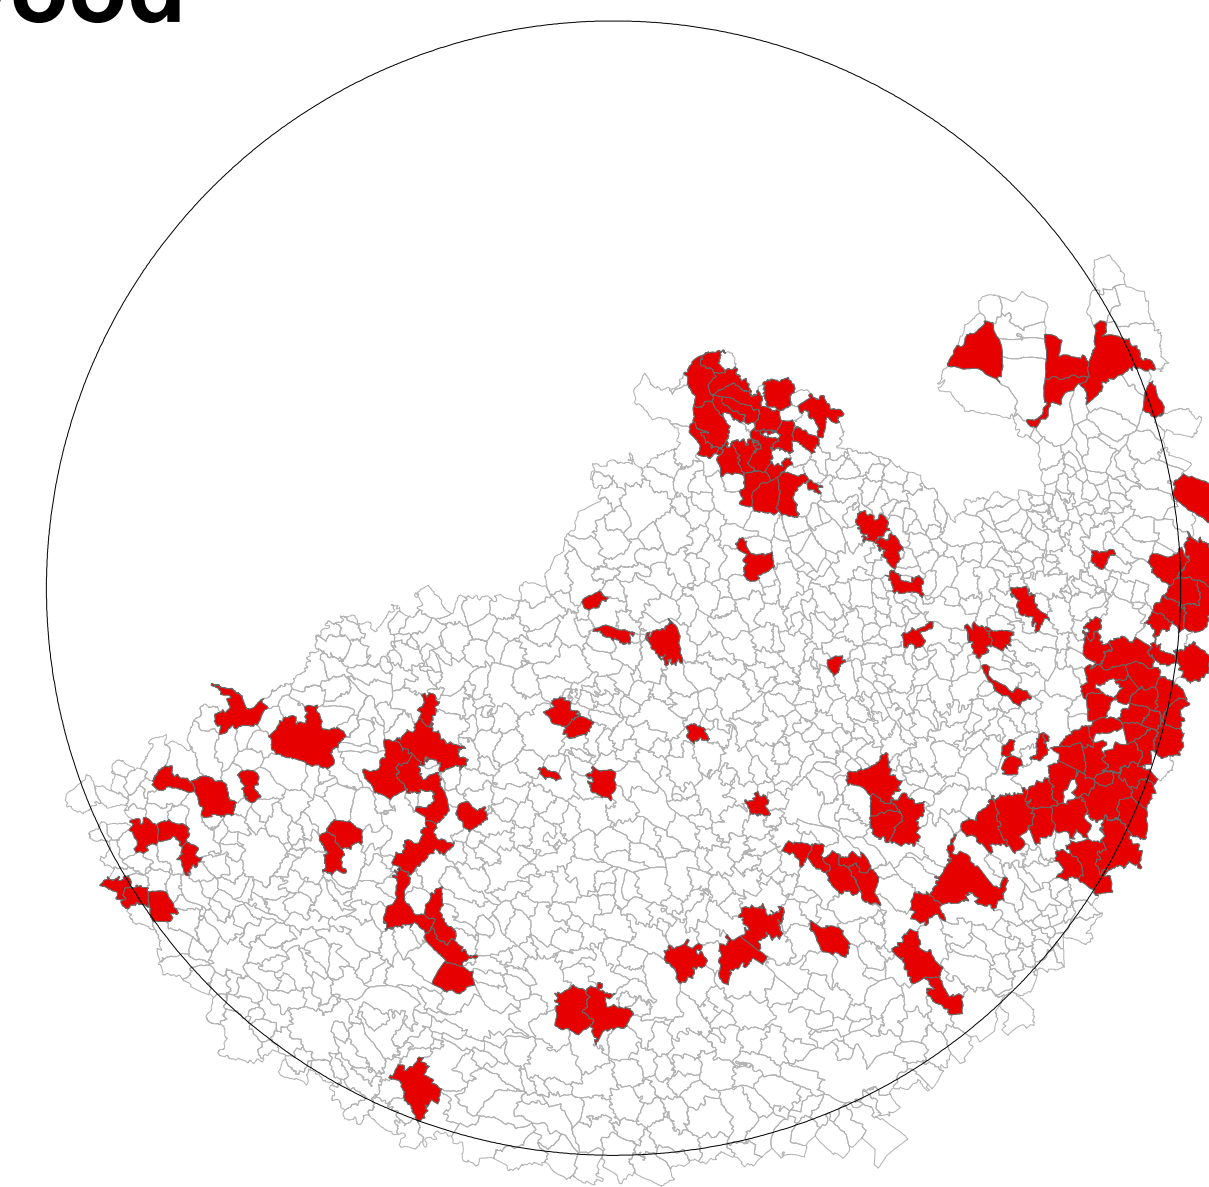

**Fagus**

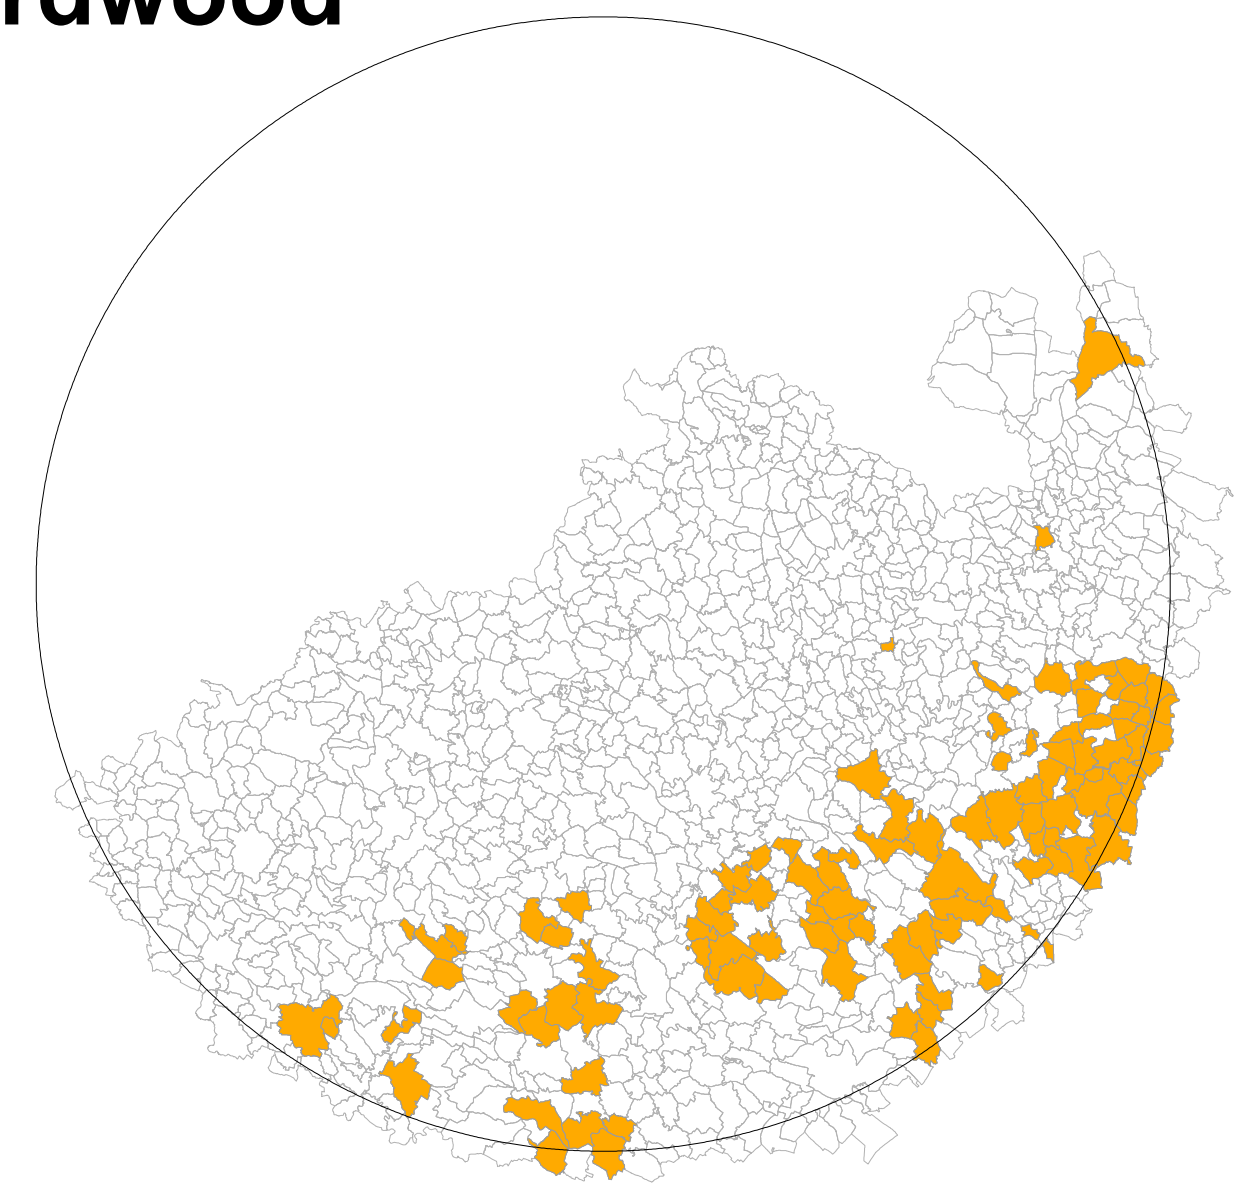

**Carpinus**

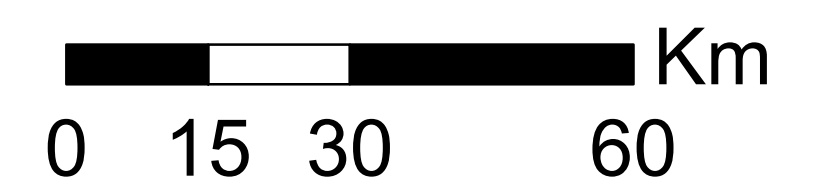

Supplement: NIHMS72110-supplement-Appendix_S3.pdf [file NIHMS72110-supplement-Appendix_S3.pdf]
